# Supplementary material
Source: publisher site journal article supplement (https://www.dovepress.com/article/248892)
Supplement: Supplementary file 1 [file get_supplementary_file.php]

**Supplementary Table S1**

**Reagents and materials used in the text**

| Reagents | Catalog number | Company |
| --- | --- | --- |
| Anti-β-actin | TA-09 | Zhongshan Golden Bridge Biotechnology  (Beijing, China) |
| Anti-Phospho-NF-κB  Anti-p65 (Ser536) (93H1) | #3033 | Cell Signaling Technology (Boston, MA, USA) |
| Anti-p65 | 10745-1-AP | Proteintech Group (Rosemont, IL, USA) |
| Anti-phospho-AMPKa (Thr172) | #2535 | Cell Signaling Technology |
| Anti-AMPKa (D5A2) | #5831 | Cell Signaling Technology |
| Anti-JAK2 | Ab39636 | Abcam (Cambridge, MA, USA) |
| Anti-JAK2 (phospho Y1007 + Y1008) | Ab32101 | Abcam |
| Anti-STAT3 | 10253-2-AP | Proteintech Group |
| Anti-phospho-Stat3 (Tyr705) | #9145 | Cell Signaling Technology |
| Anti-phospho-IkBa (Ser32) | #2859 | Cell Signaling Technology |
| Anti-IkBa (44D4) | #4812 | Cell Signaling Technology |
| Anti-CD9 | Ab92726 | Abcam |
| BCA Protein Assay Kit | CW0014S | CWBIO (Haimen, Jiangsu, China) |
| RIPA | P0013B | Beyotime Institute of Biotechnology (Jiangsu, China) |
| PMSF | ST506-2 | Beyotime Institute of Biotechnology |
| PhosSTOP phosphatase inhibitor | P1082 | Roche Diagnostics Gmbh (Indianapolis, IN, USA) |
| 5× loading buffer | P0015L | Beyotime Institute of Biotechnology |
| Enhanced Chemiluminescence Kit  and PVDF membranes | No. IPVH00010 | Millipore Corporation (Billerica, MA, USA) |
| TRIzon reagent | 01761/20114-1 | CWBIO (Haimen, Jiangsu, China) |
| Immobilon Western  Chemiluminescent HRP Substrate | WBKLS0100 | Millipore Corporation |
| Anti-TSG-101 | Ab125011 | Abcam |
| GolView | G8140 | Solarbio Science & Technology (Beijing, China) |
| Uranyl acetate |  | Sigma-Aldrich, Missouri, USA |
